# Supplementary material for: Mapping disease regulatory circuits at cell-type resolution from single-cell multiomics data
Source: bioRxiv or medRxiv preprint supplement (doi:10.1101/2022.12.06.22282077), 2023-06-06
Supplement: Supplementary file [file media-1.pdf]

# Supplementary Figures

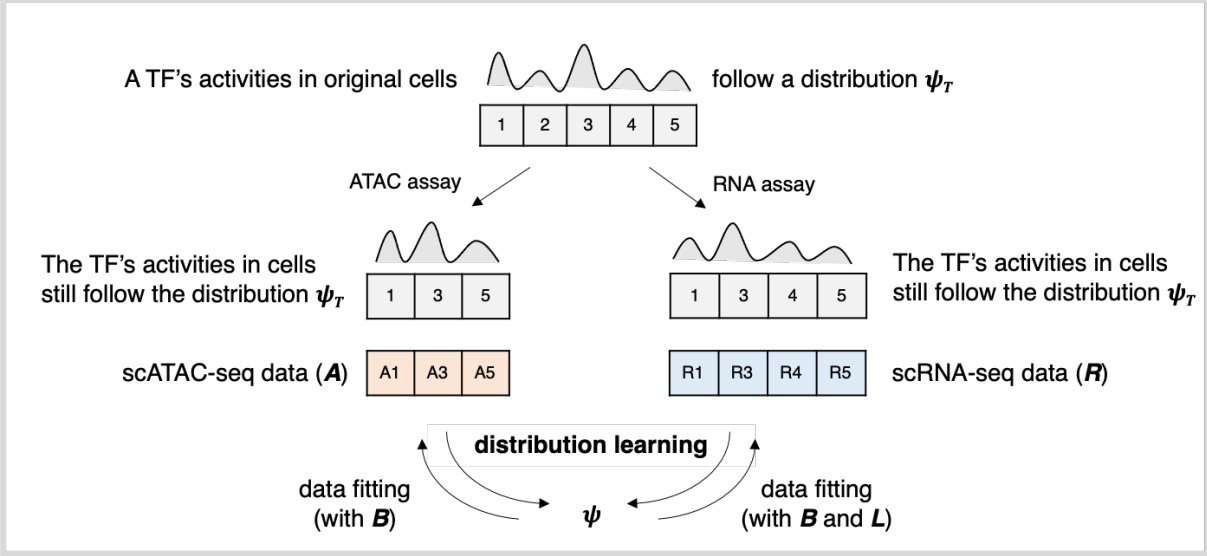

**Figure S1. Distribution learning of the hidden TF activity.** Within each cell type, the distribution of the hidden variable, TF activity, is identical across cells profiled by ATAC assay and RNA assay from the same sample. MAGICAL iteratively learns the distribution of TF activity and fits both chromatin accessibility and gene expression data together with other model parameters.

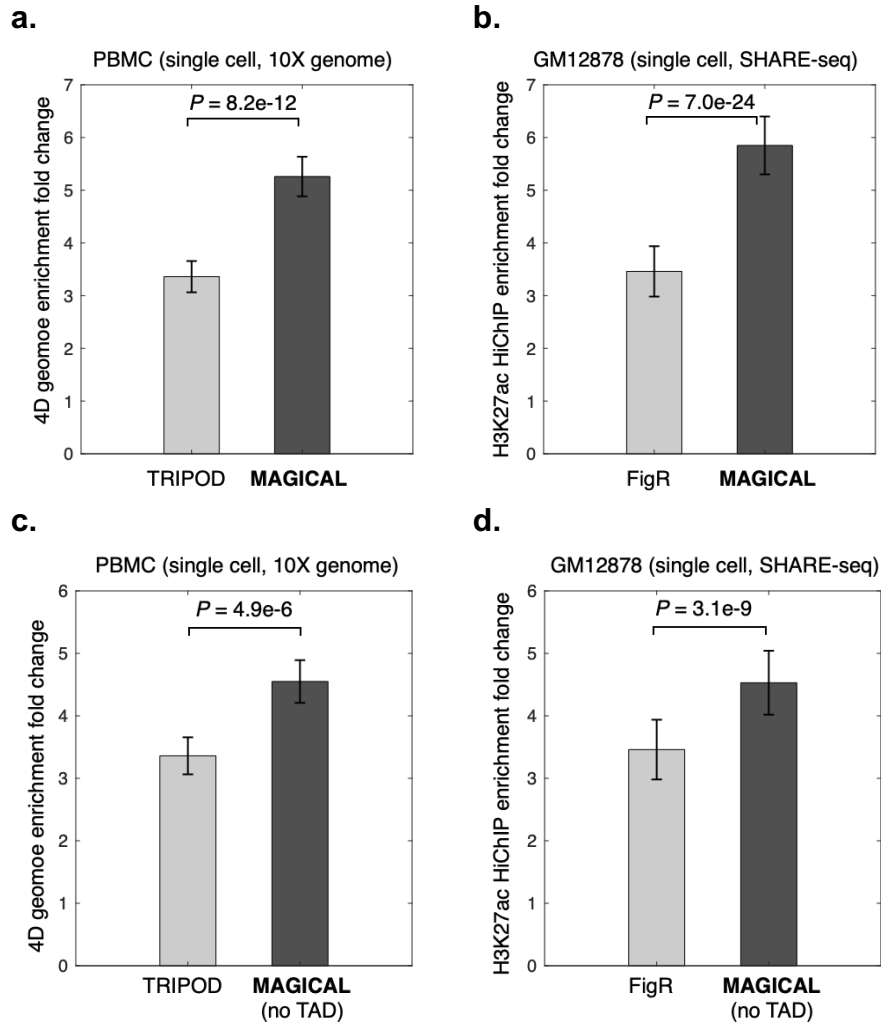

**Figure S2. Benchmarking MAGICAL and existing methods on one condition single cell multiomics data.** (a) MAGICAL-inferred peak-gene interactions in the 10X PBMC multiome dataset are significantly more enriched with experimental chromatin interactions in blood cells curated in the 4DGenome database, in comparison to the TRIPOD method. (b) MAGICAL-inferred peak-gene interactions in the GM12878 SHARE-seq dataset are significantly more enriched with distal chromatin interactions captured by an H3K27ac HiChIP experiment in GM12878 cell line, in comparison to the FigR method. (c-d) After eliminating the TAD prior, MAGICAL-inferred peak-gene interactions were still more enriched with physical chromatin interactions in both studies. The error bars in the figure represent the standard error.

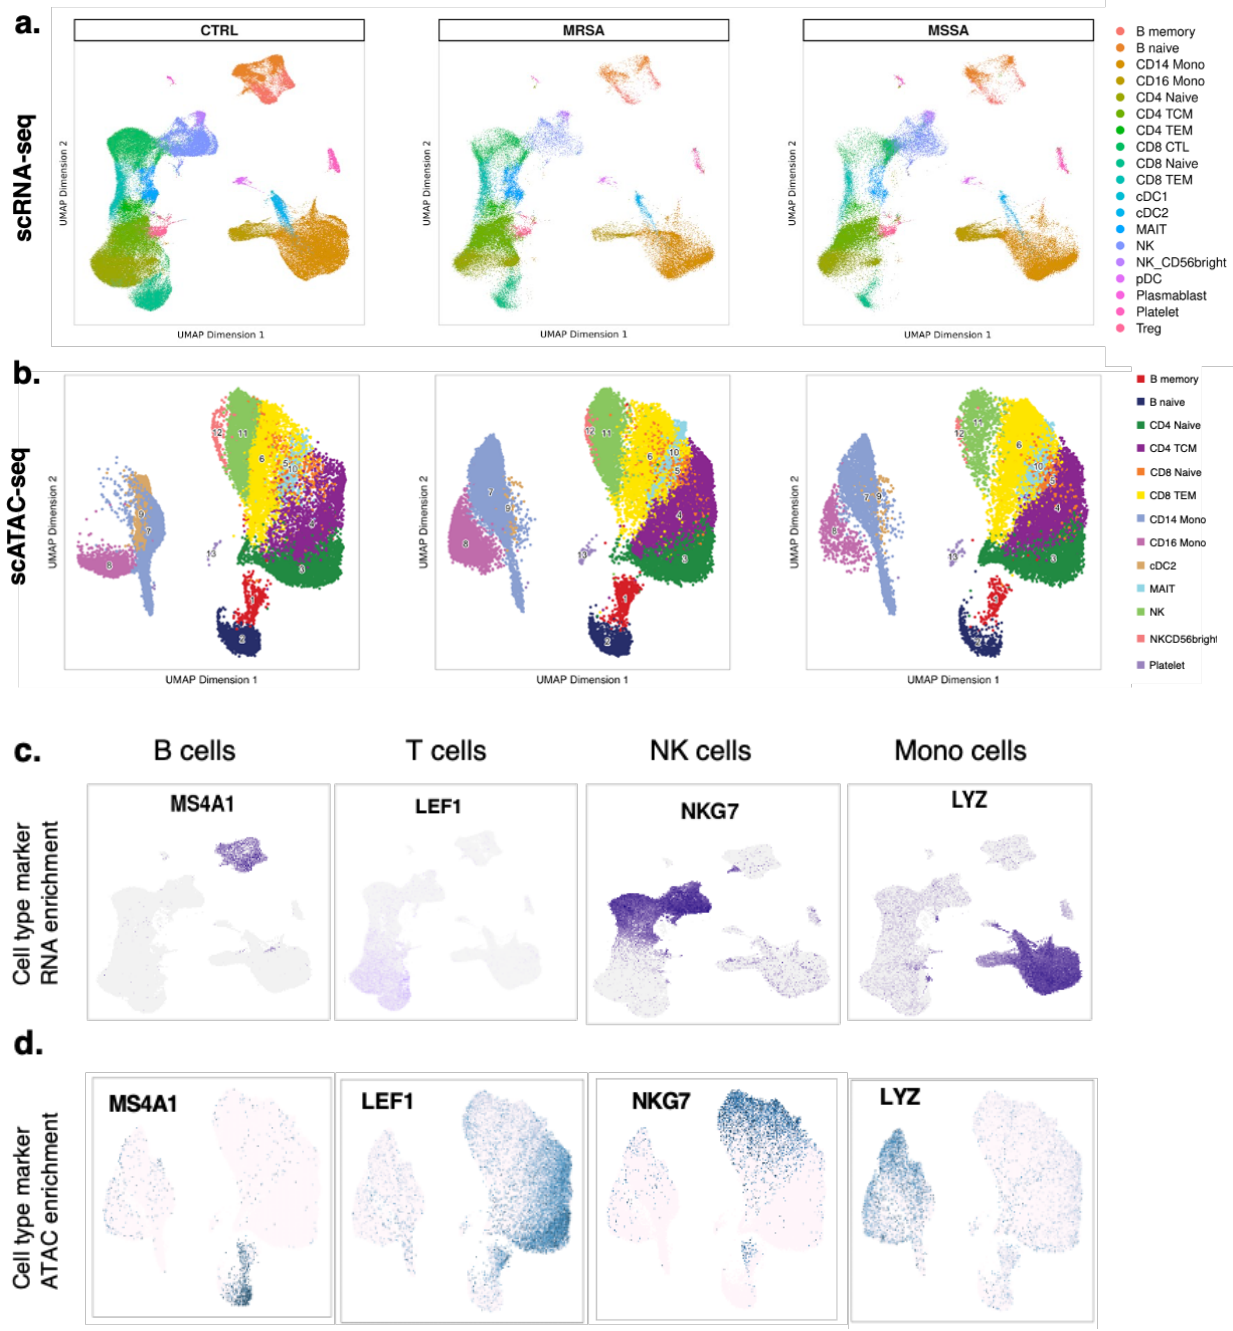

**Figure S3. UMAPs of Integrated scRNA-seq and scATAC-seq data for MRSA, MSSA, and uninfected control samples. (a)** UMAP of scRNA-seq data for each sample group. **(b)** UMAP of scATAC-seq data for each sample group. **(c)** High gene expression of cell type markers in the identified cell types. **(d)** High chromatin accessibility (gene TSS + body) of cell type markers in the identified cell types.

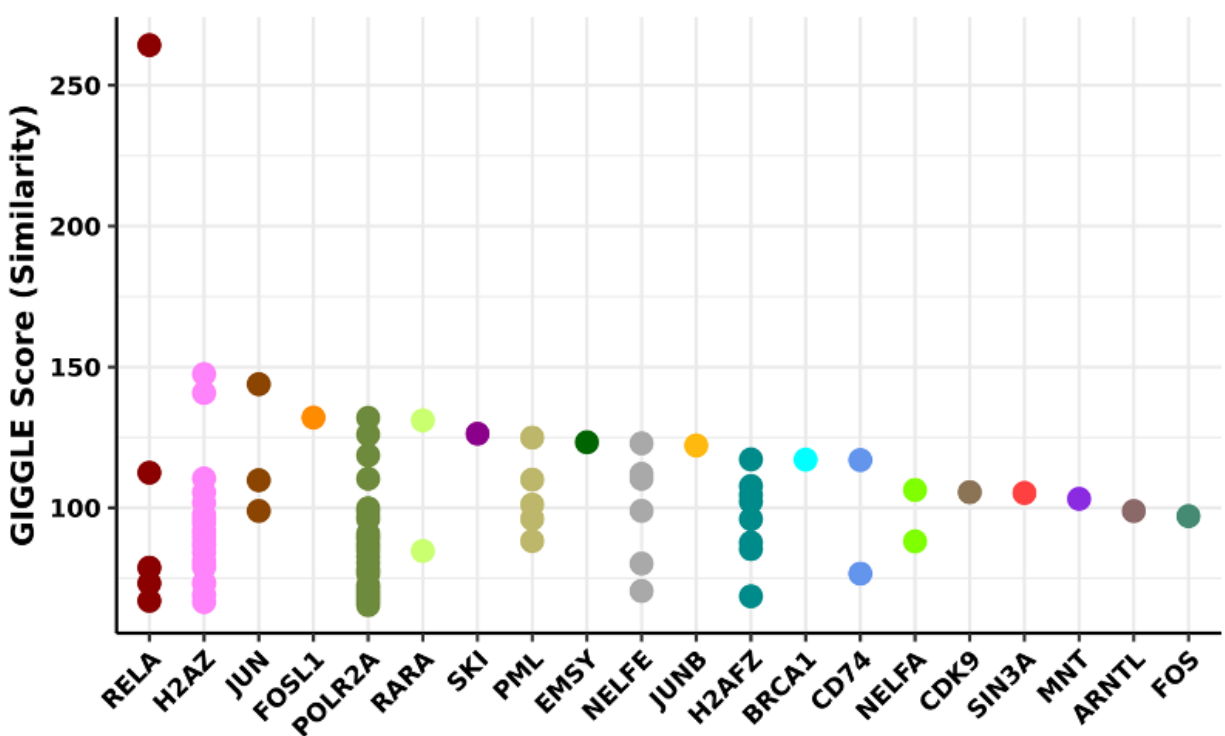

**Figure S4. Validating the inferred TF-chromatin region linkage in MAGICAL circuits in CD14 monocytes using ChIP-seq data from the Cistrome database.** MAGICAL identified AP-1 proteins as top regulators in the circuits. During the assessment of chromatin region similarity between circuit chromatin sites and top 1000 peaks in each ChIP-seq profile (human) in the Cistrome database (<http://cistrome.org/>), JUN and FOS are top ranked too.

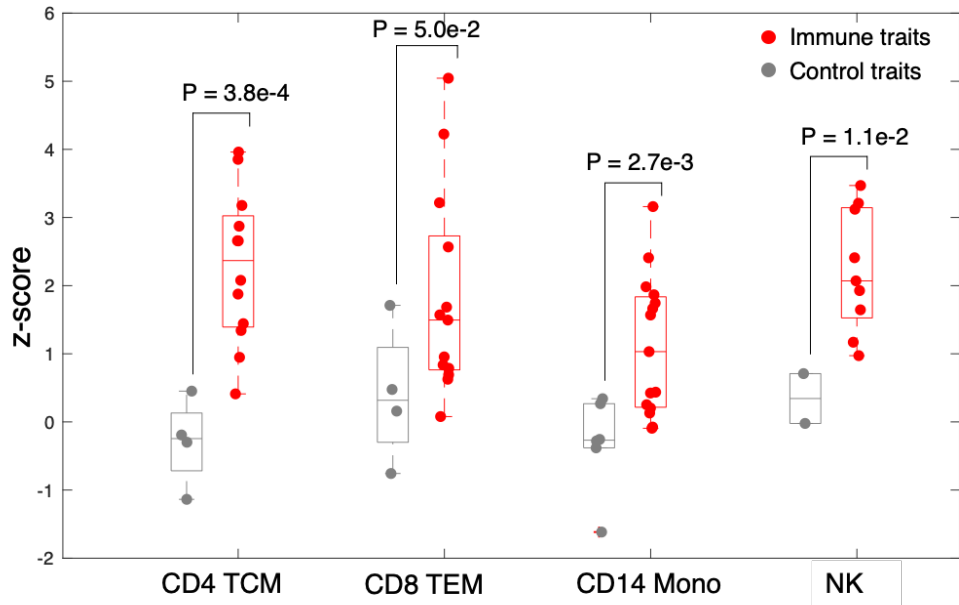

**Figure S5. Enrichment of inflammatory disease GWAS loci in circuit chromatin sites.** MAGICAL-selected circuit chromatin sites are significantly enriched with inflammatory diseases GWAS loci (including celiac disease, crohn's disease, inflammatory bowel disease, type 1 diabetes, multiple sclerosis, primary biliary cirrhosis, rheumatoid arthritis, systemic lupus erythematosus, ulcerative colitis, psoriasis), in comparison to GWAS loci of control diseases (Alzheimer's, ADHD, bipolar depression, Schizophrenia, Parkinson's, type 2 diabetes). Central values of the boxplot represent the median enrichment z-score, the box extends from the 25th to the 75th percentile, and the whiskers extend to the maximum and minimum values no further than 1.5 times the interquartile range from the hinge.

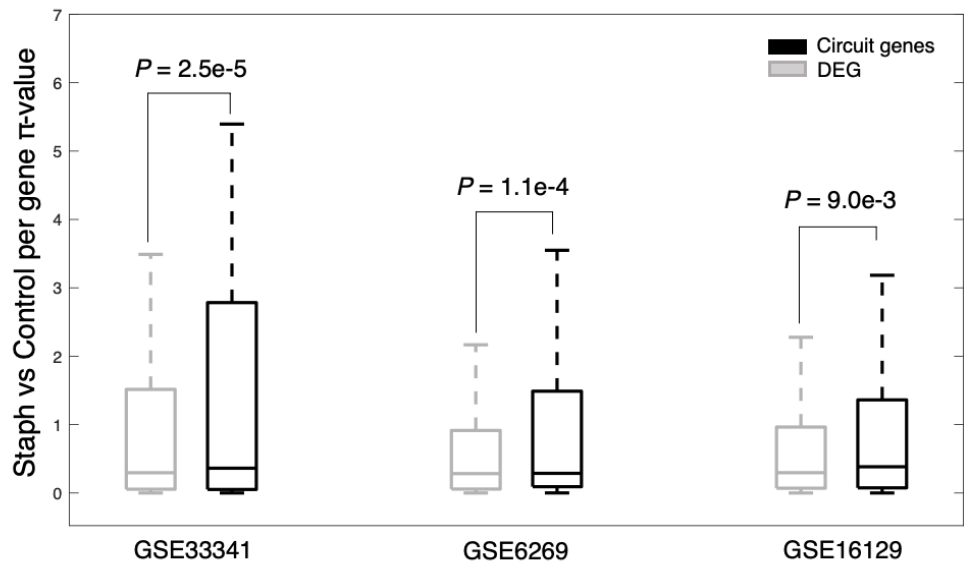

**Figure S6. Differential expression  $\pi$ -values of MAGICAL-identified circuit genes are significantly higher than that of standard DEG in the validation microarray datasets.** Central values of the boxplot represent the median  $\pi$ -value, the box extends from the 25th to the 75th percentile, and the whiskers extend to the maximum and minimum values no further than 1.5 times the interquartile range from the hinge.

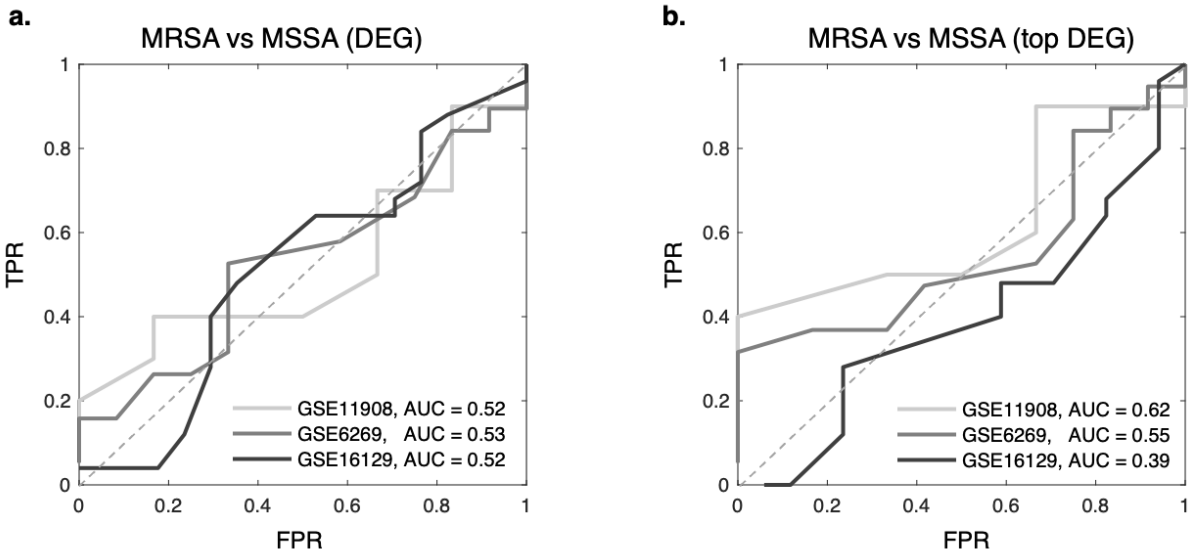

**Figure S7. ROC curves of a DEG-based classifier for antibiotic sensitivity prediction in three validation datasets. (a) ROC curves of 226 DEG with per gene AUROC > 0.7 in the discovery dataset. (b) ROC curves of the top 32 DEG.**
